# Supplementary material for: Mapping brain-wide excitatory projectome of primate prefrontal cortex at submicron resolution and comparison with diffusion tractography
Source: eLife. 2022 May 20;11:e72534. doi: 10.7554/eLife.72534 (PMC9122499; doi:10.7554/eLife.72534)
Supplement: Figure 3—source data 1. [file elife-72534-fig3-data1.xlsx]

## Sheet: raw density and volume
Lobe	Brain region	Density (pixels/mm2)	GFP volume (pixels)
Frontal lobe	8Av	56531.6	1.43816e+06
Frontal lobe	12m	48676.2	3.93109e+06
Frontal lobe	8Ad	11519.5	767383
Frontal lobe	8Bd	10967	663020
Frontal lobe	F7	9613.25	478740
Frontal lobe	F5_(6Va/6Vb)	8371.48	3.16495e+06
Frontal lobe	11l	7982.33	459910
Frontal lobe	12o	7673.65	657540
Frontal lobe	46d	3848.95	940128
Frontal lobe	9d	3427.66	494845
Frontal lobe	8Bs	2816	259455
Frontal lobe	13l	2716.46	233094
Frontal lobe	8Bm	2434.94	128740
Frontal lobe	13m	1567.76	191956
Frontal lobe	PrCO	1318.82	153426
Frontal lobe	F2_(6DR/6DC)	1178.04	590198
Frontal lobe	10mr	348.339	39967
Temporal lobe	CL	3195.2	64313
Temporal lobe	TEpv	1035.37	181885
Temporal lobe	TEa	930.56	63025
Temporal lobe	TPO	630.466	154106
Temporal lobe	IPa	609.547	89740
Temporal lobe	TEav	592.995	125269
Temporal lobe	PGa	526.391	54551
Temporal lobe	TEm	522.646	103141
Temporal lobe	TAa	493.185	83001
Temporal lobe	TEpd	468.996	95210
Temporal lobe	TEad	433.284	54105
Temporal lobe	MST	297.601	29772
Temporal lobe	FST	269.634	18814
Temporal lobe	RPB	254.116	15310
Temporal lobe	TEO	229.249	63735
Temporal lobe	CPB	155.471	11082
Limbic lobe	24c	2123.28	345907
Limbic lobe	24b	1871.75	122667
Limbic lobe	24a	1346.46	18775
Limbic lobe	24a'	995.343	17526
Limbic lobe	24b'	926.593	55136
Limbic lobe	TF	200.096	17975
Parietal lobe	LIPd	659.232	96654
Parietal lobe	SII	588.28	152388
Parietal lobe	7op	354.614	50863
Parietal lobe	7a_(Opt/PG)	284.311	66813
Parietal lobe	7b_(PFG/PF)	252.4	20293
Insular cortex	Ial	1114.42	62595
Insular cortex	Ig	401.371	36833
Subcortical region	caudate	1499.03	739212
Subcortical region	amygdala	919.415	203132
Subcortical region	Claustrum	696.225	104250
Subcortical region	MD	695.098	34855
Subcortical region	putamen	395.135	269106
Subcortical region	STN	232.068	440
Subcortical region	SNr/c	198.289	8114

## Sheet: pie chart distribution
Lobe	Percentage
Frontal lobe	0.800771
Temporal lobe	0.0662375
Limbic lobe	0.031717
Parietal lobe	0.0212373
Insular lobe	0.00545612
Subcortical regions	0.0745812

## Sheet: density and volume (percentage)
Lobe	Brain region	Density (percentage)	GFP volume (percentage)
Frontal lobe	8Av	1	0.0789193
Frontal lobe	12m	0.861044	0.215719
Frontal lobe	8Ad	0.203771	0.0421102
Frontal lobe	8Bd	0.193998	0.0363833
Frontal lobe	F7	0.170051	0.0262709
Frontal lobe	F5_(6Va/6Vb)	0.148085	0.173677
Frontal lobe	11l	0.141201	0.0252376
Frontal lobe	12o	0.135741	0.0360826
Frontal lobe	46d	0.0680849	0.0515896
Frontal lobe	9d	0.0606327	0.0271547
Frontal lobe	8Bs	0.0498129	0.0142376
Frontal lobe	13l	0.0480521	0.0127911
Frontal lobe	8Bm	0.0430722	0.00706462
Frontal lobe	13m	0.0277324	0.0105336
Frontal lobe	PrCO	0.0233289	0.00841927
Frontal lobe	F2_(6DR/6DC)	0.0208386	0.0323872
Frontal lobe	10mr	0.00616185	0.00219319
Temporal lobe	CL	0.0565206	0.00352918
Temporal lobe	TEpv	0.0183148	0.00998096
Temporal lobe	TEa	0.0164609	0.0034585
Temporal lobe	TPO	0.0111525	0.00845658
Temporal lobe	IPa	0.0107824	0.00492449
Temporal lobe	TEav	0.0104896	0.00687415
Temporal lobe	PGa	0.00931146	0.00299349
Temporal lobe	TEm	0.0092452	0.00565987
Temporal lobe	TAa	0.00872406	0.00455469
Temporal lobe	TEpd	0.00829618	0.00522466
Temporal lobe	TEad	0.00766446	0.00296902
Temporal lobe	MST	0.00526433	0.00163374
Temporal lobe	FST	0.00476962	0.00103242
Temporal lobe	RPB	0.00449512	0.000840138
Temporal lobe	TEO	0.00405525	0.00349746
Temporal lobe	CPB	0.00275017	0.000608126
Limbic lobe	24c	0.0375591	0.0189817
Limbic lobe	24b	0.0331098	0.00673136
Limbic lobe	24a	0.0238178	0.00103028
Limbic lobe	24a'	0.0176069	0.000961741
Limbic lobe	24b'	0.0163907	0.00302559
Limbic lobe	TF	0.00353954	0.00098638
Parietal lobe	LIPd	0.0116613	0.0053039
Parietal lobe	SII	0.0104062	0.00836231
Parietal lobe	7op	0.00627285	0.00279111
Parietal lobe	7a_(Opt/PG)	0.00502924	0.00366637
Parietal lobe	7b_(PFG/PF)	0.00446477	0.00111358
Insular cortex	Ial	0.0197133	0.00343491
Insular cortex	Ig	0.00709994	0.00202121
Subcortical region	caudate	0.0265166	0.0405643
Subcortical region	amygdala	0.0162638	0.0111469
Subcortical region	Claustrum	0.0123157	0.00572073
Subcortical region	MD	0.0122958	0.00191267
Subcortical region	putamen	0.00698964	0.0147672
Subcortical region	STN	0.0041051	2.4145e-05
Subcortical region	SNr/c	0.00350759	0.000445257
